# Supplementary material for: Altitudinal distribution of soil organic and inorganic carbon in a dry alpine rangeland of northern Qinghai-Tibetan Plateau
Source: Copernicus journal article supplement (doi:10.5194/egusphere-2025-1269), 2025-03-28
Supplement: Supplementary file [file egusphere-2025-1269-AC1-supplement.pdf]

## **Reviewer #1:**

Thank you very much for the reviewers' suggestions. We have made the following modifications to the questions raised by the reviewers:

The manuscript by Liu et al. investigated the pattern of changes in soil organic carbon and soil inorganic carbon along the 3000-4000 m altitude range in the northern Qinghai-Tibetan Plateau region. In this study, SOCD increased with the elevation of altitude and was attributed to the changes of dominated vegetation cover and the decreasing MAT. SICD displayed a nonlinear change and was influenced by soil C/N ratio and soil water content. The topic of the study is very interesting and they found the divergent responses of soil C component to altitude. However, there still some issues needed to be addressed before its publication. First, it is important for the authors to present scientific questions more clearly based on summarizing previous research, and further improve the logical and English expression of the paper. Second, the figure and table notes in the result section need to be modified according to the format and need to be distinguished from the font in the manuscript. Third, in the discussion section, there is still a problem of logic ambiguity in the change of soil inorganic carbon density. Please re-organize the structure of this section, so as to make the logic of the discussion section more reasonable and clearly. Further, there are many long and complex sentences in the article, please modify wherever needed. I also have some specific comments listed below.

Response: Based on the reviewers' comments, we further clarified the assumptions, corrected the chart errors, and reorganized the analysis of SIC. The specific modification contents can be found in the main text of the article and specific comments.

Specific comments:

Line 15 Please describe the experimental design in detail

Response: In the abstract, we have added the description of the experimental design. "To address this uncertainty, we uniformly selected seven points on the vertical gradient at an altitude of 3,000-4,000 meters in the northern part of the Qinghai-Tibet

Plateau to analyze the changing trends of organic carbon (SOC) and inorganic carbon (SIC) in the surface soil.”

Line 27 Please add the “ratio” after C/N

Response: Thanks very much to the suggestions of the reviewers, we have revised the sentence.

Line 32 Don't use abbreviations when writing keywords and try to spell the words in full.

Response: Thanks very much to the suggestions of the reviewers, we have revised the keywords.

Line 37 The meaning of the sentence is not clear, please revise it.

Response: We modify this sentence to “However, despite extensive studies on soil carbon pools in the past, there is still great uncertainty regarding the response of soil C pools to global climate change”.

Line 44: Please revised “whereas” to “Whereas”

Response: Thanks very much to the suggestions of the reviewers, we have revised the sentence.

Line 52 the driven factors?

Response: Based on the reviewers' opinions, we added specific influencing factors such as climate and vegetation. For specific modifications, please refer to line 52-54.

Line 53-55 This sentence is long, so please split into two short sentences.

Response: We modify this sentence to “The Qinghai-Tibet Plateau rises sharply in the altitude gradient, and the ecosystem types have the characteristics of spatial differentiation. Among different ecological types, there are significant differences in climate, vegetation and soil characteristics”.

Line 58-63 Again, the description of research progress is also too long. It will be better to raise the knowledge gap in a separate sentence.

Response: According to the reviewers' comments, we modify this sentence to “ However, most studies in this region have mainly focused on the vegetation or soil change patterns of permafrost and meadow ecosystems (Wang et al., 2023a; Chen et al., 2017; Cai et al., 2025. The variation patterns of vegetation and soil carbon pools

in alpine meadow ecosystems in arid areas have been largely ignored”.

Line 70 delete most

Response: Thanks very much to the suggestions of the reviewers, we have revised the sentence.

Line 71 in the soil C storage

Response: Thanks very much to the suggestions of the reviewers, we have revised the sentence.

Line 72 Previous studies may have neglected the role of SIC in soil carbon inventory in this region.

Response: Thanks very much to the suggestions of the reviewers, we added this sentence.

Line 73-75 Please delete this repetitive sentence.

Response: Thanks very much to the suggestions of the reviewers, we have revised the sentence.

Line 75-78 These statement about the altitude changes in vegetation and soil nutrient availability should have appeared earlier in this paragraph.

Response: We placed the description of the changes in vegetation and nutrients on the altitude gradient in paragraphs line 58-62.

Line 79 whether or to what extent the altitudinal changes in micro-environments and vegetation would affect SOC and SIC remains unknown.

Response: Thanks very much to the suggestions of the reviewers, we have revised the sentence.

Line 87-90 The two hypotheses are similar: the relative importance of SOC to SIC decreases with altitude vs. SIC would become more profound at higher altitudes.

Response: According to the reviewers' comments, we modified the hypothesis as “(1) With the increase of altitude, the decrease of temperature and the increase of vegetation, the content of soil organic carbon increases; (2) With the increase of altitude, the drought limitation is alleviated and the inorganic carbon content in the soil decreases; (3) With the increase of altitude, the proportion of organic carbon in the soil carbon pool increases, while the proportion of inorganic carbon decreases.”

Line 115 The description of the methods that the experiment was conducted should be further addressed.

Response: Thanks very much to the suggestions of the reviewers, we have revised the methods in line 118-121.

Line 126 The soil was collected from 0-30 cm, which was different from 0-20 cm in other literatures. Please explain in the materials and methods and explain why this soil layer is used.

Response: This is mainly because in this study area, there are more vegetation such as dwarf shrubs, and the root systems are mostly distributed in the range of 0-30cm. Therefore, we chose a soil layer of 0-30cm.

Line 136 The measuring method of SIC is unclear. Is it a calculated value by subtracting SOC from TC or a measured value?

Response: The content of SIC was directly determined by neutralization titration.

Fig. 2b There were two regression lines, but only one R<sup>2</sup> and P values was reported?

Line 198 In Table 1 and Figs 3, 4, the listed variables mismatched, please revise them in the result.

Response: We have corrected the errors in the chart. For the specific correction content, please refer to the chart in the main text.

Line 235: showed

Response: Thanks very much to the suggestions of the reviewers, we have revised the sentence.

Line 236-238: Further, soil organic C pool linearly increased, while soil inorganic C pool appears to be nonlinear along the altitudinal gradient.

Response: Thanks very much to the suggestions of the reviewers, we have added the sentence in line 246-247.

Line 246 Unexpectedly, this study found the negative correlation between soil organic C pool and aboveground biomass density. This could be explained by...

Response: Thanks very much to the suggestions of the reviewers, we have added the sentence in line 255-257.

Line 258 showed

Response: Thanks very much to the suggestions of the reviewers, we have revised the sentence.

Line 263, 264 delete “effect”

Response: Thanks very much to the suggestions of the reviewers, we have revised the sentence.

Line 267-271 Please make a summarized conclusion about how vegetation abundance and climate together affect SOC here.

Response: According to the research content, a summary of the impact on SOC has been added at the end of this paragraph. “Therefore, with the increase of the altitude gradient and the decrease of temperature, the vegetation type gradually changes from desert to grassland, the soil carbon input increases, the mineralization rate decreases, and the SOC content increases.”

Line 278 Under this condition, plants may grow faster...

Response: Thanks very much to the suggestions of the reviewers, we have added the sentence in line 291.

Line 280-282 Please move this main result to L. 274, which could support the role of soil N content in accumulating SOC.

Response: Thanks very much to the suggestions of the reviewers, we have revised the sentence.

Line 288 could be attributed to alluvial deposit...

Response: Response: Thanks very much to the suggestions of the reviewers, we have revised the sentence in line 300-303.

Line 296 soil inorganic C pool

Response: Thanks very much to the suggestions of the reviewers, we have revised the sentence.

Line 297-298 This concluded sentence is a bit contradictory with the previous sentence.

Response: The sentence structure description is incorrect. We will modify the high altitude area to the low altitude area.

Line 305 on the one hand

Response: Thanks very much to the suggestions of the reviewers, we have revised the sentence.

Line 311-313 Please modify this sentence more clearly

Response: Thanks very much to the suggestions of the reviewers, we have revised the sentence as “Our research results show that in the dry, high and cold plateau area of the Qinghai-Tibet Plateau, organic carbon increases linearly with the increase of altitude, while silicon carbide first increases and then decreases with the increase of altitude. ”
